# Supplementary material for: The Development of Anammox and <em>Chloroflexi</em> Bacteria during Composting of Sewage Sludge
Source: Preprints.org preprint supplement (doi:10.20944/preprints202206.0062.v1), 2022-06-06
Supplement: Supplementary file 2 [file supplementary]

## Sheet: Table S1
Table S1. Microbial community in sewage sludge compost samples							Legend:
							A	1st week of composting
CLASS	ORDER	FAMILY	A	B	C		B	2nd week of composting
__			0.00309329	0.0179518	0		C	4th week of composting
Acidimicrobiia	Actinomarinales	uncultured	0.000989854	0.0384337	0.0245034
	IMCC26256	IMCC26256	0.000866122	0	0
	Microtrichales	__	0	0.00240964	0
		Iamiaceae	0.00433061	0.0120482	0.00855444
		Ilumatobacteraceae	0.0384806	0.0179518	0.0326229
		Microtrichaceae	0.0122494	0.00903614	0.00753951
		uncultured	0.000989854	0.00698795	0.00724953
Actinobacteria	Bifidobacteriales	Bifidobacteriaceae	0	0.000843373	0
	Corynebacteriales	Dietziaceae	0	0.000843373	0
		Mycobacteriaceae	0.00185598	0.00674699	0
		Nocardiaceae	0.0149715	0.0124096	0.0390025
	Euzebyales	Euzebyaceae	0	0.00216867	0.000869943
	Micrococcales	Cellulomonadaceae	0	0.00253012	0
		Intrasporangiaceae	0.0508537	0.050241	0.0278382
		Micrococcaceae	0.00296956	0.0101205	0.00376975
		Micrococcales_Incertae_Sedis	0	0	0.00130492
	Micromonosporales	Micromonosporaceae	0.00532047	0.00939759	0
	PeM15	PeM15	0	0	0.00347977
	Propionibacteriales	Propionibacteriaceae	0.000866122	0.00301205	0.00695955
	Pseudonocardiales	Pseudonocardiaceae	0.00148478	0.00144578	0.000869943
	Streptomycetales	Streptomycetaceae	0	0.00566265	0
	Streptosporangiales	Nocardiopsaceae	0.00173224	0	0.00217486
		Streptosporangiaceae	0	0.00144578	0
		Thermomonosporaceae	0	0.00385542	0.00217486
	uncultured	uncultured	0.00247463	0	0
Alphaproteobacteria	__	__	0	0.00481928	0
	Acetobacterales	Acetobacteraceae	0	0.000722892	0
	Azospirillales	Azospirillaceae	0	0.00192771	0
		Azospirillales_Incertae_Sedis	0.00185598	0	0
	Caulobacterales	Caulobacteraceae	0	0.0215663	0
	Ferrovibrionales	Ferrovibrionaceae	0	0.00144578	0
	Kiloniellales	Fodinicurvataceae	0	0.00433735	0.00478469
	Reyranellales	Reyranellaceae	0.000989854	0	0
	Rhizobiales	__	0.00148478	0.00253012	0
		Beijerinckiaceae	0.00247463	0.0203614	0.00101493
		Devosiaceae	0.00890869	0.00674699	0.0030448
		Hyphomicrobiaceae	0	0.0073494	0.00420473
		Rhizobiaceae	0.0150953	0.0520482	0.0337828
		Rhizobiales_Incertae_Sedis	0.0113833	0.00421687	0.00521966
		Xanthobacteraceae	0.00247463	0.00325301	0.00188488
	Rhodobacterales	Rhodobacteraceae	0.0420688	0.0116867	0.0166739
	Rickettsiales	Mitochondria	0	0.00060241	0
	Sphingomonadales	Sphingomonadaceae	0.000247463	0.0122892	0.0015949
Anaerolineae	Caldilineales	Caldilineaceae	0	0.00216867	0
	SBR1031	A4b	0	0.0154217	0.00420473
		SBR1031	0	0.00939759	0.00217486
Bacilli	Acholeplasmatales	Acholeplasmataceae	0	0	0.00376975
	Bacillales	Bacillaceae	0.126578	0.0350602	0.260403
		Planococcaceae	0.00890869	0.00650602	0
	Brevibacillales	Brevibacillaceae	0	0.00156627	0
	Erysipelotrichales	Erysipelotrichaceae	0.000371195	0	0.00246484
	Haloplasmatales	Haloplasmataceae	0	0.00180723	0.00492968
	Izemoplasmatales	Izemoplasmatales	0	0.00433735	0.00652458
	Lactobacillales	Carnobacteriaceae	0.00222717	0.00120482	0
		Enterococcaceae	0.0126206	0	0
		Lactobacillaceae	0.0459045	0.00192771	0
		Leuconostocaceae	0.00457807	0.000843373	0
	Paenibacillales	Paenibacillaceae	0	0.00722892	0
	Thermoactinomycetales	Thermoactinomycetaceae	0.00668151	0.00710843	0.00869943
	uncultured	uncultured	0.00074239	0	0.00826446
Bacteroidia	__	__	0	0.00337349	0
	Bacteroidales	Bacteroidaceae	0.0340262	0.000481928	0.0130492
		Dysgonomonadaceae	0.00470181	0.0046988	0.0258083
		Marinilabiliaceae	0	0	0.00739452
		Paludibacteraceae	0.0027221	0	0
		Prevotellaceae	0.00222717	0	0
		Rikenellaceae	0.000494927	0	0
		Tannerellaceae	0.0102697	0	0.0111643
	Chitinophagales	Chitinophagaceae	0.00222717	0.0512048	0.00362476
		Saprospiraceae	0.00927988	0.00156627	0.00246484
	Cytophagales	Spirosomaceae	0	0.0163855	0.00188488
	Flavobacteriales	Flavobacteriaceae	0.0230141	0.00650602	0.00637959
		NS9_marine_group	0	0.00445783	0
		Weeksellaceae	0.0179411	0.0585542	0.0117442
	Sphingobacteriales	AKYH767	0.000247463	0	0
		Lentimicrobiaceae	0	0.000481928	0
		Sphingobacteriaceae	0.0139817	0.0120482	0.00594461
Blastocatellia	Blastocatellales	Blastocatellaceae	0	0.00518072	0
Campylobacteria	Campylobacterales	Arcobacteraceae	0.000371195	0	0
Chlamydiae	Chlamydiales	__	0.000494927	0	0
		Parachlamydiaceae	0.00457807	0.00108434	0
Chloroflexia	Chloroflexales	Chloroflexaceae	0	0.00253012	0
		Roseiflexaceae	0	0.00963855	0
	Thermomicrobiales	Thermomicrobiaceae	0.000494927	0.0046988	0.00289981
Clostridia	Caldicoprobacterales	Caldicoprobacteraceae	0.0252413	0.00457831	0.0216036
	Clostridia	Hungateiclostridiaceae	0	0.00289157	0.00246484
	Clostridia_vadinBB60_group	Clostridia_vadinBB60_group	0	0	0.000869943
	Clostridiales	Caloramatoraceae	0	0.00168675	0
		Clostridiaceae	0.00618659	0.00192771	0.00652458
	Eubacteriales	Garciellaceae	0	0.00108434	0
	Lachnospirales	Defluviitaleaceae	0	0.000843373	0
		Lachnospiraceae	0.0467706	0	0
	Oscillospirales	Ruminococcaceae	0.00111359	0	0
		UCG-010	0	0.00204819	0.00217486
	Peptococcales	Peptococcaceae	0	0.00289157	0.00347977
	Peptostreptococcales-Tissierellales	__	0.000866122	0	0
		Anaerovoracaceae	0.0257362	0	0.00231985
		Peptostreptococcaceae	0.0131156	0.00204819	0.00318979
		Peptostreptococcales-Tissierellales	0.130042	0.0592771	0.0479919
		Proteiniboraceae	0	0.00240964	0
	Proteinivoracales	uncultured	0	0.0039759	0.00188488
Cyanobacteriia	Chloroplast	Chloroplast	0	0.00060241	0
D8A-2	D8A-2	D8A-2	0	0.000963855	0
Deinococci	Deinococcales	Trueperaceae	0	0.0259036	0.014934
	Thermales	Thermaceae	0.0077951	0	0.0983036
Desulfitobacteriia	Desulfitobacteriales	Desulfitobacteriaceae	0	0.00060241	0.00231985
		Desulfitobacteriales	0	0	0.000724953
Desulfotomaculia	Desulfotomaculales	Desulfotomaculales	0.00148478	0.00240964	0
Dethiobacteria	Dethiobacterales	Dethiobacteraceae	0.00074239	0	0
Fimbriimonadia	Fimbriimonadales	Fimbriimonadaceae	0	0.00349398	0
Fusobacteriia	Fusobacteriales	Fusobacteriaceae	0.0126206	0.000240964	0.000434972
		Leptotrichiaceae	0.0027221	0	0.000434972
Gammaproteobacteria	__	__	0.000618659	0	0.00188488
	Alteromonadales	Idiomarinaceae	0	0	0.00188488
	Burkholderiales	Alcaligenaceae	0.00482554	0.0206024	0.0113093
		Comamonadaceae	0.0252413	0.00385542	0.0100043
		Methylophilaceae	0	0	0.000724953
		Neisseriaceae	0	0	0.000289981
		Rhodocyclaceae	0	0.00168675	0
		Sutterellaceae	0.00160851	0.000481928	0.000289981
	Coxiellales	Coxiellaceae	0.000989854	0	0.000289981
	Methylococcales	Methylococcaceae	0.010146	0.00385542	0.0060896
	Pseudomonadales	Moraxellaceae	0.0205395	0	0
		Pseudomonadaceae	0.00371195	0.00120482	0.00811947
	Run-SP154	Run-SP154	0.00334076	0	0
	Steroidobacterales	Steroidobacteraceae	0	0.00337349	0
	Xanthomonadales	Rhodanobacteraceae	0	0.0128916	0
		Xanthomonadaceae	0.010146	0.0290361	0.00217486
Gemmatimonadetes	Gemmatimonadales	Gemmatimonadaceae	0	0.00289157	0
Incertae_Sedis	DTU014	DTU014	0	0.00108434	0
Limnochordia	Limnochordales	Limnochordaceae	0.00173224	0.00891566	0.0381325
	Limnochordia	Limnochordia	0	0.00204819	0.00333478
	M55-D21	M55-D21	0	0.0013253	0.00391475
	MBA03	MBA03	0.000494927	0.00674699	0.0121792
	uncultured	uncultured	0.000618659	0.000843373	0.00217486
Longimicrobia	Longimicrobiales	Longimicrobiaceae	0	0.000963855	0
Moorellia	Desulfitibacterales	Desulfitibacteraceae	0.000866122	0.00746988	0
Myxococcia	Myxococcales	Vulgatibacteraceae	0.00111359	0.00746988	0.00666957
Negativicutes	Acidaminococcales	Acidaminococcaceae	0.00408315	0	0.00130492
OLB14	OLB14	OLB14	0	0.000722892	0.00144991
Phycisphaerae	Phycisphaerales	Phycisphaeraceae	0.00074239	0	0
	Tepidisphaerales	WD2101_soil_group	0	0.00301205	0.000724953
Planctomycetes	Isosphaerales	Isosphaeraceae	0.00148478	0.000843373	0
	Pirellulales	Pirellulaceae	0.00631032	0.00481928	0
	Planctomycetales	Rubinisphaeraceae	0.00148478	0.0013253	0
Polyangia	Polyangiales	BIrii41	0	0.00156627	0
		Phaselicystidaceae	0	0.00253012	0
		Sandaracinaceae	0	0.00421687	0.00115992
Rhodothermia	Rhodothermales	Rhodothermaceae	0	0.000722892	0
S0134_terrestrial_group	S0134_terrestrial_group	S0134_terrestrial_group	0.000247463	0.0172289	0.00173989
Saccharimonadia	Saccharimonadales	__	0.0165801	0.0125301	0.0076845
		LWQ8	0.00123732	0.00578313	0.0015949
		Saccharimonadaceae	0.00445434	0.00819277	0.00130492
		Saccharimonadales	0.0206632	0.00626506	0.00231985
Sericytochromatia	Sericytochromatia	Sericytochromatia	0	0.00108434	0
SJA-28	SJA-28	SJA-28	0.00259837	0	0.000869943
Sulfobacillia	Sulfobacillales	Sulfobacillaceae	0	0	0.00594461
Symbiobacteriia	Symbiobacteriales	Symbiobacteraceae	0.00878495	0.0128916	0.00985936
		uncultured	0	0.00698795	0.000869943
Syntrophomonadia	Syntrophomonadales	Syntrophomonadaceae	0.00173224	0.00554217	0.00202987
Thermaerobacteria	Thermaerobacterales	Thermaerobacteraceae	0	0	0.00289981
Thermoanaerobacteria	Thermoanaerobacterales	SRB2	0.00111359	0.000963855	0
Thermoleophilia	Gaiellales	uncultured	0	0.00060241	0
	Solirubrobacterales	Solirubrobacteraceae	0	0.00180723	0
Thermotogae	Petrotogales	Petrotogaceae	0	0	0.000579962
Thermovenabulia	Thermovenabulales	Thermovenabulales	0	0	0.00289981
Verrucomicrobiae	Chthoniobacterales	Chthoniobacteraceae	0	0.00168675	0
		Xiphinematobacteraceae	0	0.000963855	0
	Verrucomicrobiales	__	0	0.00361446	0
		Rubritaleaceae	0.00136105	0	0
		Verrucomicrobiaceae	0.000494927	0.00240964	0
Vicinamibacteria	Vicinamibacterales	uncultured	0	0.00518072	0
WPS-2	WPS-2	WPS-2	0	0.000963855	0.000724953
